# Supplementary material for: Fabrication of pitch-derived hard carbon via bromination-assisted pyrolysis strategy for sodium-ion batteries
Source: Royal Society of Chemistry journal article supplement (doi:10.1039/d4nr05322b), 2025-01-01
Supplement: d4nr05322b1.pdf [file d4nr05322b1.pdf]

## Supporting Information

### **Fabrication of Pitch-Derived Hard Carbon via Bromination-Assisted Pyrolysis Strategy for Sodium-Ion Batteries**

Mengke Liu<sup>a,b</sup>, Zhe Zhang<sup>b</sup>, Jihao Wu<sup>b</sup>, Xinghua Han<sup>a\*</sup>, and Juan Yang<sup>b\*</sup>

<sup>a</sup> School of Chemistry and Chemical Engineering, North University of China, Xue yuan Road 3, Taiyuan 030051, PR China

<sup>b</sup> School of Chemical Engineering and Technology, Xi'an Jiaotong University, Shaanxi, Xi'an, 710049, China

\*Corresponding authors.

E-mail addresses: hxh@nuc.edu.cn (X.Han), juanyang@mail.xjtu.edu.cn (J.Yang)

#### **Material characterization**

The morphology and microstructure of the brominated pitch-based hard carbon materials were observed by field emission transmission electron microscopy (TEM, JEM-F200) and field emission scanning electron microscopy (SEM, MAIA3 LMH). The porosity and specific surface area properties of the prepared samples were characterized using the Micrometrics ASAP 2460 N<sub>2</sub> adsorption-desorption tester at 77 K. X-ray diffraction (XRD, SHIMADZU 6100) with Cu-K alpha radiation was used to characterize the crystal structure and parameters of hard carbon materials. The DXR 2xi Raman spectrometer with a 532 nm Argon ion laser to determine the defect structure of samples. X-ray photoelectron spectroscopy (XPS) analysis was performed using ESCALAB 250Xi to measure the elemental composition and surface chemical properties of the samples.

### **Electrochemical test details**

The electrochemical properties of samples were tested in a CR2016 coin cell. For the preparation of the working electrodes, the obtained hard carbon was mixed with carbon black and SA binder in a mass ratio of 8:1:1, by adding an appropriate amount of deionized water as a solvent and then coating the slurry on a copper foil collector. The slurry was vacuum-dried at 80°C for 12 hours and left to cool to room temperature. The mass loading was approximately 1 mg cm<sup>-2</sup>. Coin cells were mounted in a glove box under an argon atmosphere (Mikrouna, H<sub>2</sub>O < 0.1 ppm, O<sub>2</sub> < 0.1 ppm), Na disc was used as counter-electrode, and glass fiber was used as separators by adding a certain amount of electrolyte. The Galvanostatic charge-discharge (GCD) and Galvanostatic Intermittent Titration Technique (GITT) measurements were made using the Land 2001A battery test system at 0.001-2.6 V. Cyclic Voltammetry (CV) and Electrochemical Impedance Spectroscopy (EIS) were performed on the Biologic VMP3 electrochemical workstation.

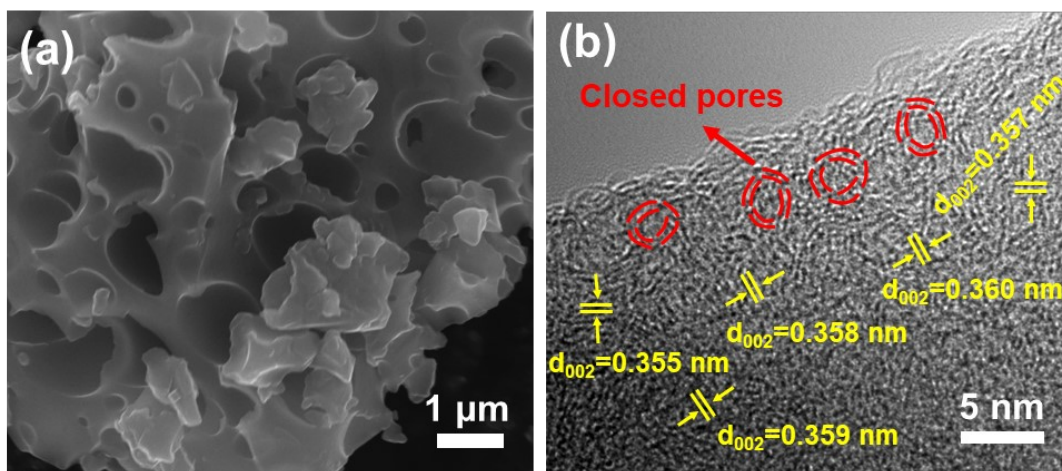

**Fig. S1** SEM (a) and HR-TEM (b) images of the BHC-1500.

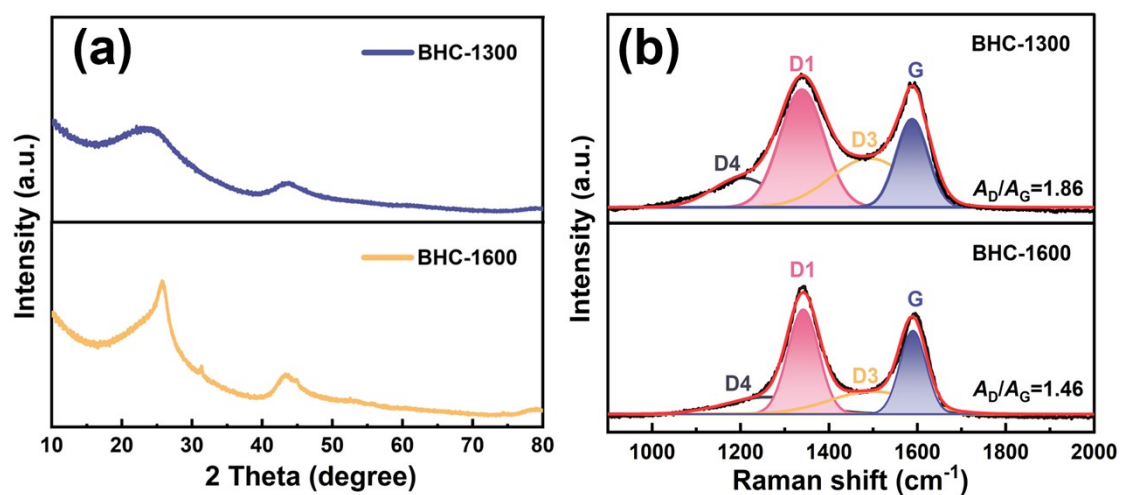

**Fig. S2** (a) XRD patterns of the BHC-1300 and BHC-1500. (b) Raman spectra of BHC-1300 and HC-1600.

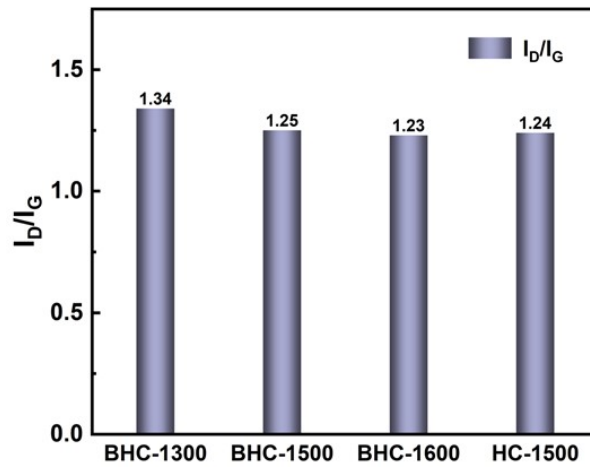

**Fig. S3**  $I_D/I_G$  values of BHC-1300, BHC-1500, BHC-1600, and HC-1500 samples.

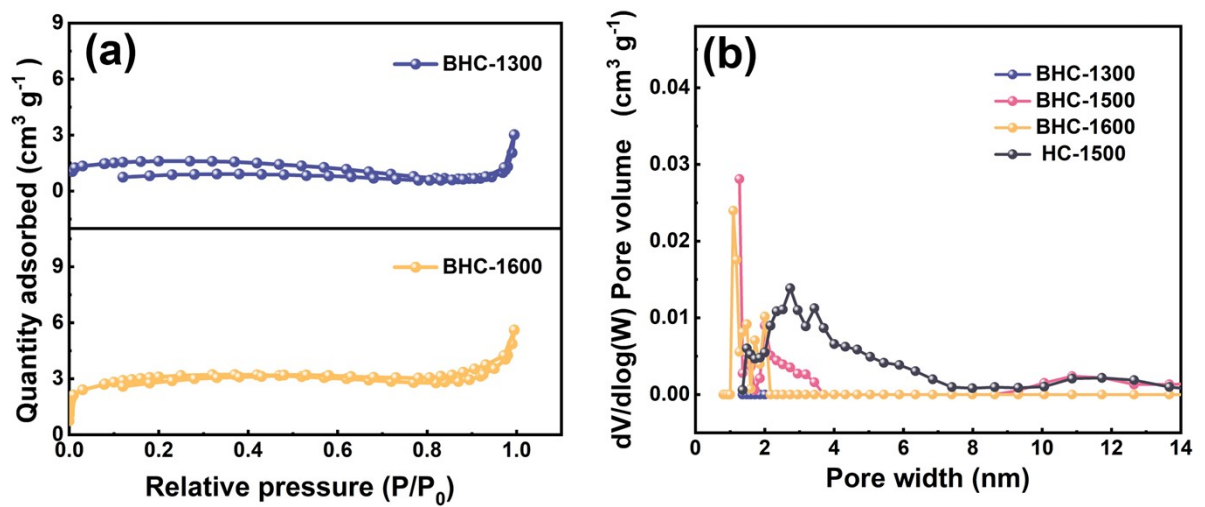

**Fig. S4** (a) N<sub>2</sub> adsorption and desorption curves of BHC-1300 and BHC-1600. (b) Pore width distribution of BHC-1300, BHC-1500, BHC-1600, and HC-1500.

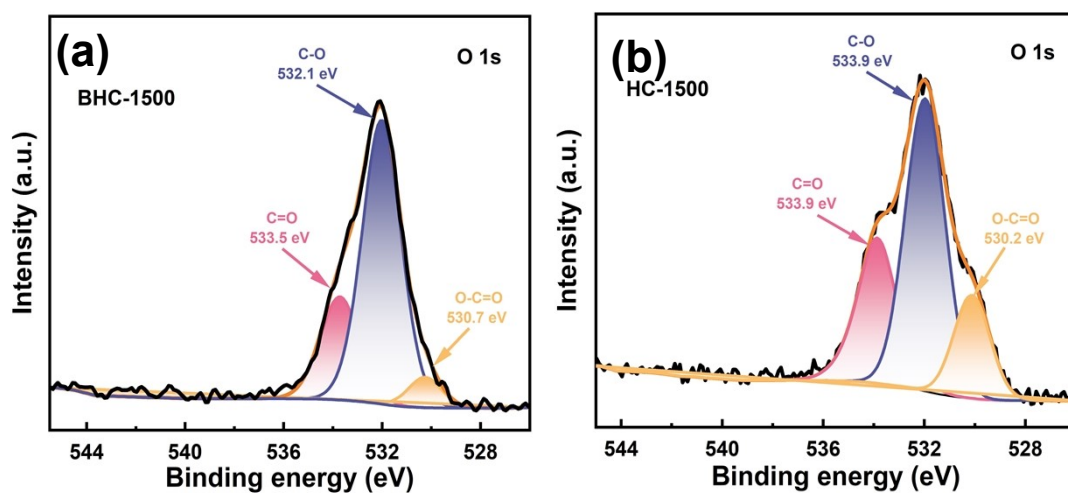

Fig. S5 XPS high-resolution O 1s spectra of (a) BHC-1500 and (b) HC-1500.

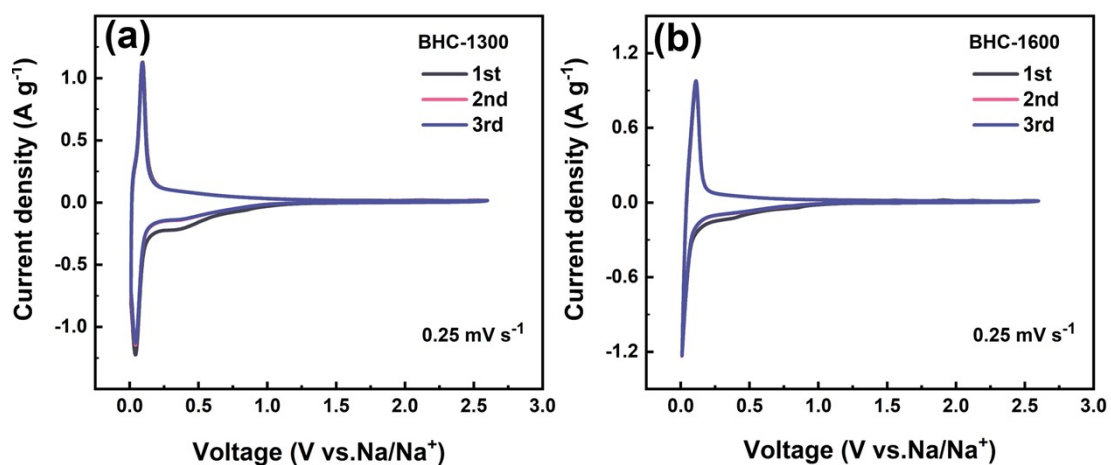

Fig. S6 CV curves of (a) HC-1500 and (b) BHC-1500 at a scan rate of 0.25 mV s<sup>-1</sup> in the initial three cycles.

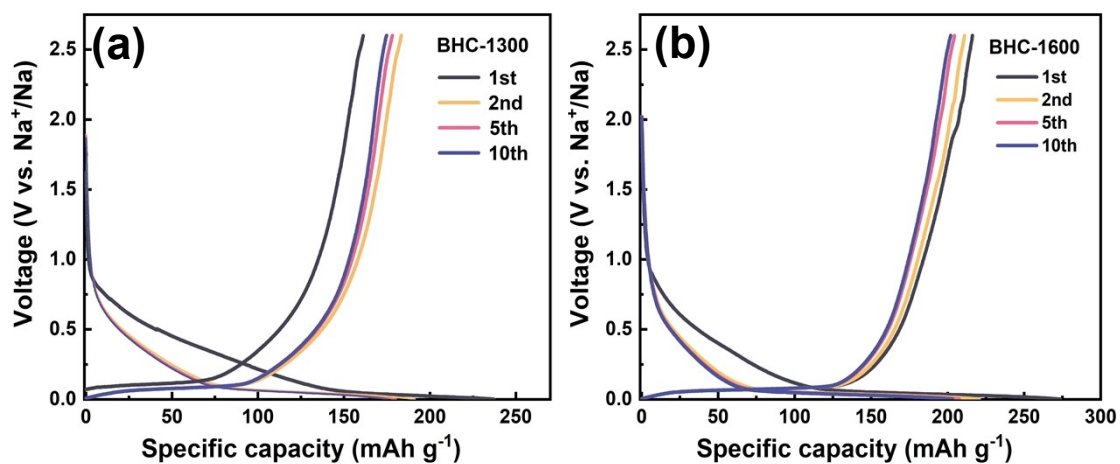

**Fig. S7** GCD profiles in the first 10 cycles of (a) BHC-1300 and BHC-1600(b) at a current density of  $0.1 \text{ A g}^{-1}$ .

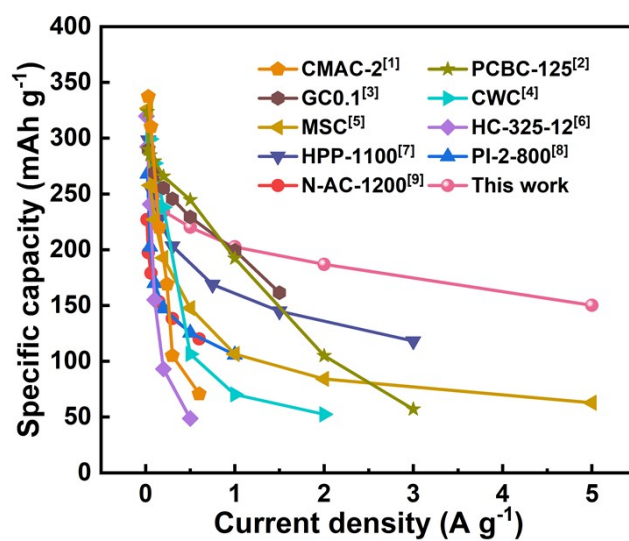

**Fig. S8** Comparison of rate performance of pitch-derived hard carbon for sodium-ion batteries between this work and others reported in previous literature<sup>1-9</sup>.

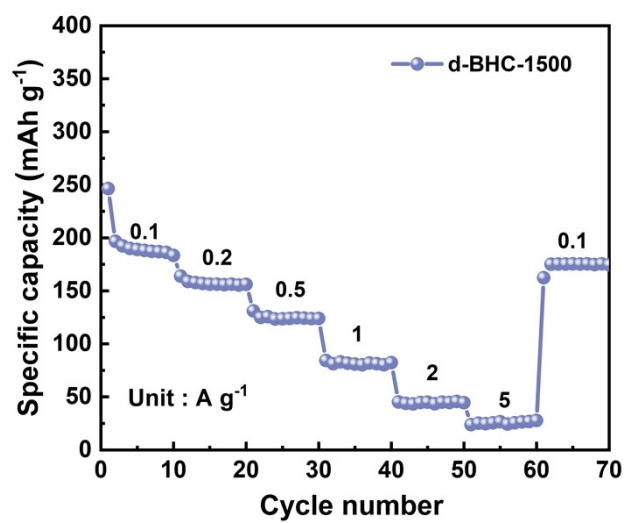

**Fig. S9** Rate capability of the d-BHC-1500 at different current densities.

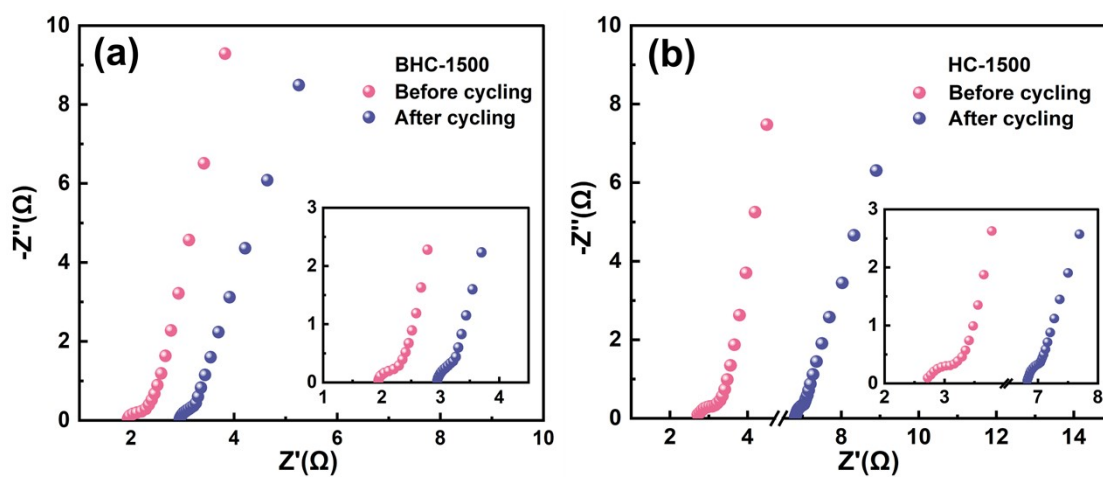

**Fig. S10** EIS profiles of (a) BHC-1500 and (b) HC-1500 before and after long-term cycling (the inset is an enlarged view of the EIS).

**Table S1** The calculated interlayer spacing of pitch-derived hard carbon materials based on (002) diffraction peak

| Sample   | $2\theta$ (°) | $d_{002}$ (nm) |
|----------|---------------|----------------|
| BHC-1300 | 23.150        | 0.384          |
| BHC-1500 | 25.246        | 0.355          |
| BHC-1600 | 25.723        | 0.346          |
| HC-1500  | 25.554        | 0.348          |

**Table S2** Textural properties of pitch-derived hard carbon materials

| Sample   | $S_{\text{BET}}$ ( $\text{m}^2 \text{g}^{-1}$ ) | Pore volume ( $\text{cm}^3 \text{g}^{-1}$ ) |
|----------|-------------------------------------------------|---------------------------------------------|
| BHC-1300 | 6.00                                            | 0.0042                                      |
| BHC-1500 | 16.35                                           | 0.0115                                      |
| BHC-1600 | 11.18                                           | 0.0083                                      |
| HC-1500  | 13.5                                            | 0.0111                                      |

**Table S3** Surface elemental composition of BHC-1500 and HC-1500

| Sample   | C (at.%) | O (at.%) | Br (at.%) |
|----------|----------|----------|-----------|
| BHC-1500 | 94.63    | 5.34     | 0.03      |
| HC-1500  | 94.01    | 5.99     | 0         |

**Table S4** The  $R_{\text{ct}}$  values of BHC-1500 and HC-1500 before and after long-term cycling

| Sample   | $R_{\text{ct}}$ before cycling ( $\Omega$ ) | $R_{\text{ct}}$ after cycling ( $\Omega$ ) |
|----------|---------------------------------------------|--------------------------------------------|
| BHC-1500 | 0.234                                       | 0.438                                      |
| HC-1500  | 0.296                                       | 0.518                                      |



## Notes and references

1. G. Zhao, T. Xu, Y. Zhao, Z. Yi, L. Xie, F. Su, Z. Yao, X. Zhao, J. Zhang, W. Xie, X. Li, L. Dong and C.-M. Chen, *Energy Storage Materials*, 2024, **67**, 103282.
2. Z. Zhou, Z. Wang and L. Fan, *Chemical Engineering Journal*, 2024, **490**, 151428.
3. R. Wu, J. Yin, Y. Liu, R. Zhang, H. Zhang, C. Yang, H. Wang, H. Zhu, L. Ai, L. Wang and J. Yin, *Small*, 2025, **21**, 2409116.
4. B. Cao, H. Liu, B. Xu, Y. Lei, X. Chen and H. Song, *Journal of Materials Chemistry A*, 2016, **4**, 6472-6478.
5. S. Zhang, N. Sun, X. Li, R. A. Soomro and B. Xu, *Energy Storage Materials*, 2024, **66**, 103183.
6. R. Xu, Z. Yi, M. Song, J. Chen, X. Wei, F. Su, L. Dai, G. Sun, F. Yang, L. Xie and C.-M. Chen, *Carbon*, 2023, **206**, 94-104.
7. J. Wang, L. Yan, B. Liu, Q. Ren, L. Fan, Z. Shi and Q. Zhang, *Chinese Chemical Letters*, 2023, **34**, 107526.
8. S. Fu, T. Yang, Y. Song, X. Tian, C. Wang, Z. Ma, J. Wu and Z. Liu, *Applied Surface Science*, 2024, **657**, 159731.
9. R. Li, B. Yang, A. Hu, B. Zhou, M. Liu, L. Yang, Z. Yan, Y. Fan, Y. Pan, J. Chen, T. Li, K. Li, J. Liu and J. Long, *Carbon*, 2023, **215**, 118489.
